# Supplementary material for: A qualitative study of the construction of a microsurgical chief surgeon training course
Source: Research Square preprint supplement (doi:10.21203/rs.3.rs-8260361/v1), 2025-12-11
Supplement: Supplementary file 1 [file 62b5b977ae848d92d9114451.docx]

**Interview Guide on Learning Needs for Basic Microsurgical Skills Training**

Dear Doctor,

We are investigators from the research team for the development of the Basic Microsurgical Skills Training Course at Central South University. We are conducting a survey on the learning needs related to basic microsurgical skills training, aiming to understand current views and needs of microsurgeons regarding basic microsurgical skills training in order to optimize the course. Your responses, together with those of other doctors, will be used for our analysis and will not be disclosed externally. Thank you for your support of our work.

**01. Professional Significance**

**Main question:**

What do you think is the significance of learning and mastering the basic knowledge and skills of microsurgery for orthopedics?

**Probing question:**

In your opinion, what profound impact does mastering microsurgical skills have on personal career development?

**02. Current Status and Development of Microsurgery**

**Main question:**

How do you view the current status and development trends of microsurgery? What notable changes may occur in technology and clinical applications?

**Probing question:**

With the introduction of new technologies (such as robot-assisted surgery and 3D microscopes), do you think the core skills of microsurgical procedures will change in the future? With the progress of the times, will mastering microsurgical skills still be necessary, or will they be replaced by robots?

**03. Training of Excellent Surgeons**

**Main question:**

What qualities do you think an excellent microsurgical surgeon should possess? Can these qualities be acquired through training?

**Probing question:**

Besides technical ability, should psychological qualities and the ability to cope with stress also be included in training? How can key qualities such as fine manipulation and patience be cultivated during training?

**04. Training of Microsurgeons**

**Main question:**

For your specialty, at what stage do you think it is most appropriate to begin basic microsurgical skills training? Why?

Probing question:

If the stage is early (such as during residency training), is there a problem of insufficient basic knowledge? If the stage is late, will it negatively affect the growth of the physician?

**05. Course Content Design**

**Main question:**

What content should be included in the basic microsurgical skills training course? How should these contents be arranged?

**Probing question:**

Should the arrangement of training content be personalized according to the different baseline levels of learners?

**06. Balance Between Theory and Practice**

**Main question:**

How should the course hours for theoretical knowledge and practical skills be allocated? How can the balance between the two be ensured?

**Probing question:**

Should this allocation be adjusted at different learning stages? How can time be reserved in the course design for reflection and feedback?

**07. Key Points and Difficulties**

**Main question:**

In basic microsurgical skills training, where do you think the key points of the training should be?

**08. Difficult-to-Master Content**

**Main question:**

Which contents are the most difficult to master?

**Probing question:**

Do you have specific teaching strategies or methods to help learners overcome these difficulties? In your experience, what common mistakes do learners tend to make when facing these difficult points?

**09. Training Duration and Progress**

**Main question:**

How long do you think the entire training cycle should be? How can it be ensured that students master the necessary skills within the specified time?

**Probing question:**

Within how much time can students reach a proficient level? During the training cycle, how should the progress be adjusted to accommodate different learning speeds?

**10. Teaching Methods**

**Main question:**

Do you think medical simulation teaching is necessary? Why? What other teaching methods can be used to improve the effectiveness of training?

**Probing question:**

Do you have specific cases that illustrate the advantages of simulation training? Besides simulation teaching, which forms of teaching (such as mentorship, surgical observation, virtual reality technology) do you think are most effective?

**11. Teaching Assessment**

**Main question:**

How do you think learners should be assessed? Which key indicators should be emphasized in the assessment? Why?

**12. Teaching Resources and Support**

**Main question:**

In basic microsurgical skills training, what teaching resources and support should be provided to learners? How should these resources be effectively utilized?

**Probing question:**

Do you think online resources (such as instructional videos and virtual surgical simulations) can supplement traditional face-to-face training? What effects do these resources have on helping learners study independently and improve skill levels?

**13. Suggestions for Course Development**

**Main question:**

Do you have any additional suggestions for the development of the basic microsurgical skills training course?

**Probing question:**

In the current training system, do you see any potential opportunities for improvement? How can interdisciplinary collaboration or international experience be used to enrich the training course?
